# Supplementary material
Source: PubMed Central journal article supplement (PMC1088331)
Supplement: plntphys_pp.104.057018_1.pdf [file plntphys_pp.104.057018_1.pdf]

**Supplemental Table I: Degenerate primers used to isolate pea flowering gene homologues**

| <b>Gene</b>  | <b>Primer</b>  | <b>Primer sequence<br/>(5' to 3')</b>       | <b>aa sequence</b> |
|--------------|----------------|---------------------------------------------|--------------------|
| <i>CCA1</i>  | <b>MYB.4</b>   | ACATCTTTTGTAAGGYTTRAANCC                    | TGFKPYKR           |
|              | <b>MYB.6</b>   | CTTACTGATYCKTGGAARGARGT                     | TTDSWKEV           |
| <i>COLa</i>  | <b>CO.1</b>    | GACTCTTGCTTCNCKRTCCAT                       | MDREARV            |
|              | <b>CO.4</b>    | AAGCCGGCAYCAACGVTNCC                        | ARRHQQVP           |
| <i>COLb</i>  | <b>CO.FX</b>   | TGTGATTCAGAGGTTTCATTCTGCNAAAYCCWYTNCGC      | CDSEIHSANPLA       |
|              | <b>CO.RX</b>   | TAAGCCTTTCTCGAAGCATACCTTATNGTYTTYTCRAA      | FEKTIRYASRKA       |
| <i>ELF3</i>  | <b>DEL3.1</b>  | TCTTCACCTAGTAGCAAACGCACCAGAGAYCCNGARGA      | SSPSSKRTRDPPEE     |
|              | <b>DEL3.4</b>  | ATGCAGAGCCAGGAGGATGTGTNCKCATYTG             | QMRTQPCGPAS        |
| <i>ELF4</i>  | <b>DEL4.1</b>  | CAGTCGGTGTCTTGACAGGAACAGAGCAATAATHCARCARGT  | QSVLDRNRAIIQQV     |
|              | <b>DEL4.2</b>  | GAGATCAGAATAAAGAGAAGCAACCTTTGAAATRTTNCRRTT  | NGNISKVVSMYSDL     |
| <i>EMF1</i>  | <b>EMF.2</b>   | ATGGCAAARAAYCARTAYGA                        | MAKNQYE            |
|              | <b>EMF.3</b>   | GGAATGGTGAAATCNGCNGG                        | PADFTIP            |
| <i>FCA</i>   | <b>FCA.F2</b>  | TGTTGGATCTGTTCTTAGACTCGCNGCNCANGARGA        | FVGSVPRTATEE       |
|              | <b>FCA.R9</b>  | GTTTCAGCAAATCTAACAAATCAGAGGTYGRTTRCA        | CNQLLIVRFAEP       |
| <i>FLD</i>   | <b>DFLD.1</b>  | TGGCAYCTTGCAAATTTGGAATATGCAAA               | WHLANLEYAN         |
|              | <b>DFLD.2</b>  | CYCCACMMTTTCDGCTAAAATATCRTAATC              | DYDILAESVGD        |
| <i>FPA</i>   | <b>DFPA.3</b>  | GGGAAAGGGATCGGGACAGAGCTTCCNGARGTNGT         | GKIGTELPEVV        |
|              | <b>DFPA.4</b>  | GTATTTGGAGAAGAAGATTGGCNGCRAAYTG             | QFAANLLLQIQ        |
| <i>FT</i>    | <b>DFT.1</b>   | TCTATACACTGGTGATGACAGACCCNGAYGYNCC          | FYTLVMVDPDVP       |
|              | <b>DFT.4</b>   | TCTTCCACCASAGCCAGATTTCYCKCTGAMWRTT          | NCQRESGCCGR        |
| <i>FVE</i>   | <b>DFVE.1</b>  | GGAAATCTCTTGTCTCTGTTCTTTAYGAYTGGYT          | KSLVPVLYDWL        |
|              | <b>DFVE.4</b>  | AATGTTCCCCCTCCACCAGTACTTKCRCARTCRTC         | DDCESTGGGGTL       |
| <i>GI</i>    | <b>GI.3</b>    | CTCATAWGARCRTAACTCC                         | WSYSSNE            |
|              | <b>GI.5</b>    | TTCCTCAGCVGTTGATYTKC                        | NSSAVDLP           |
| <i>LD</i>    | <b>LD.5</b>    | CTTGCCCTGYTYGADATRTC                        | DISNRAK            |
|              | <b>LD.9</b>    | AATCCTCTCGCNCARGARATG                       | NPLAQEM            |
| <i>LHY</i>   | <b>MYB.1</b>   | ACAAAGCAGMGAGARARDTGG                       | TKQERERW           |
|              | <b>MYB.3</b>   | TTCTTTTAGGTCKKGGMGNGG                       | PPPRPKR            |
| <i>PFT1</i>  | <b>DPFT.4</b>  | TGTGAACATTTTGAAGAATCTCTWCWAAGCACGNCAGGTNATG | VNILNNLSQARQVM     |
|              | <b>DPFT.7</b>  | CATGTGRTCTGAGATATAAGCCGAACATTTGTCAT         | MHDQSILRVIQM       |
| <i>SOC1a</i> | <b>MADS.1</b>  | ATGGTGAGAGGAAARACNCARATG                    | MVRGKTQM           |
|              | <b>MADS.3</b>  | GACCTTCTGTTYTNTGYGAYG                       | ELSVLCDA           |
| <i>SOC1b</i> | <b>AGL.3</b>   | TCAAGGAGKTCDATYTTYTTCAT                     | MKKIEQUE           |
|              | <b>FLF.7</b>   | CTGGCCARTACYTKRTTYTC                        | ENQVLAS            |
| <i>SVP</i>   | <b>DSVP.1</b>  | ATGGCTMGWGERAAGATTCAAATWAARAAGATTGAAAA      | MAREKIQIKKIEN      |
|              | <b>DSVP.4</b>  | AGCTYTCATAGTCYTGCGRRGWCCAGTRGARTT           | NSTGPPQDYESS       |
| <i>TOC1</i>  | <b>DTOC1.3</b> | AGTTGATAGGAGAGAAGCAGCATTGHTNAARTTYMG        | VDRREAALMKFR       |
|              | <b>DTOC1.4</b> | GATCCACATTAATACCATTCAACTHTCTGACRAAYTGNC     | GQFVRKMNGINVDL     |
| <i>VRN1</i>  | <b>DVRN1.3</b> | TRCGRCCCTCMTATTTTAYAGGGRTGYATAATGTATYT      | RPSYLYRGCIMYL      |
|              | <b>DVRN1.4</b> | GGCTTAACTTDGCYCKRCCWCCYYTATADAGGCAGCGAAC    | VRCLYRGGRAKLSQ     |
| <i>VRN2</i>  | <b>DVRN2.1</b> | CACTCACACAGAGTYCAGCCYATGGCACTRGAACAAGT      | HSHRVQPMALQV       |
|              | <b>DVRN2.2</b> | TCAAGAAGVCCAAGATTCCAAGTTT                   | KLWNHGLLD          |

**Supplemental Table II: MADS-box genes**

| Name                                                                               | Arabidopsis                                      |                                               | Pea            |      | Medicago                                                                      |                                                                           | Soybean                                        | Lotus                |
|------------------------------------------------------------------------------------|--------------------------------------------------|-----------------------------------------------|----------------|------|-------------------------------------------------------------------------------|---------------------------------------------------------------------------|------------------------------------------------|----------------------|
|                                                                                    | Gene                                             | Gene                                          | % <sup>a</sup> | Ref. | Genomic                                                                       | EST                                                                       | EST                                            | EST                  |
| <i>API</i><br><i>APETALA 1</i>                                                     | AT1G69120                                        | <i>PsPIM</i> <sup>b</sup><br>(AJ291298)       | 71%<br>(FL)    | 2,6  | AC144726 <sup>b</sup>                                                         | -                                                                         | TC202688                                       | -                    |
| <i>FUL</i><br><i>FRUITFULL</i>                                                     | AT5G60910                                        | <i>PsFUL</i><br>(AY884287)                    | 64%<br>(FL)    | 1,5  | AC146650b <sup>b,d,e</sup>                                                    | TC84496 <sup>d</sup><br>TC82227 <sup>d</sup><br>AL387855 <sup>b,d,e</sup> | TC196829                                       | -                    |
| <i>AGL6</i><br><i>AGAMOUS-LIKE 6</i>                                               | AT2G45650                                        | <i>PsMADS3</i> <sup>b,d</sup><br>(AY884288)   | 38%<br>(FL)    | 1    | -                                                                             | AW688164 <sup>d</sup>                                                     | TC220575 <sup>d</sup>                          | -                    |
| <i>AGL13</i><br><i>AGAMOUS-LIKE 13</i>                                             | AT3G61120                                        | <i>PsMADS5</i> <sup>b,d</sup><br>(AY884289)   | 56%<br>(FL)    | 1    | -                                                                             | -                                                                         | -                                              | -                    |
| <i>SEPI</i><br><i>SEPALATA 1, 2</i>                                                | AT5G15800                                        | <i>PsSEPI-2</i> <sup>b</sup><br>(AY884290)    | 72%<br>(FL)    | 1    | AC146650a <sup>b,d,e</sup>                                                    | BQ123807 <sup>b,d,e</sup>                                                 | TC173284 <sup>d</sup><br>TC195391 <sup>d</sup> | -                    |
| <i>SEP3</i><br><i>SEPALATA 3</i>                                                   | AT1G24260                                        | <i>PsMTF1</i><br>(AJ223318)                   | 71%<br>(FL)    | 4    | AC144644                                                                      | -                                                                         | TC194024 <sup>d</sup><br>TC199866 <sup>d</sup> | BP037461             |
| <i>SEP4</i><br><i>SEPALATA 4</i>                                                   | AT2G03710                                        | -                                             | -              | -    | -                                                                             | -                                                                         | -                                              | TC17725 <sup>d</sup> |
| <i>SOCI</i><br><i>SUPPRESSOR OF OVEREXPRESSION OF CONSTANS 1</i>                   | AT2G45660                                        | <i>PsSOC1a</i> <sup>b,c,f</sup><br>(AY830920) | 64%<br>(FL)    | 1    | -                                                                             | TC78994                                                                   | TC184543                                       | -                    |
|                                                                                    |                                                  | <i>PsSOC1b</i> <sup>b,c</sup><br>(AY826729)   | 63%<br>(P:86%) | 1    |                                                                               |                                                                           |                                                |                      |
| <i>AGL14</i><br><i>AGL19</i><br><i>AGAMOUS-LIKE 14, 19</i>                         | AT4G11880<br>AT4G22950                           | -                                             | -              | -    | -                                                                             | TC78724 <sup>d</sup><br>BE124909 <sup>d</sup>                             | -                                              | -                    |
| <i>SVP</i><br><i>SHORT VEGETATIVE PHASE</i>                                        | AT2G22540                                        | <i>PsSVP</i><br>(AY830919)                    | 71%<br>(P:90%) | 1    | AC135848 <sup>b,c</sup>                                                       | TC87621 <sup>b,c</sup>                                                    | TC183173                                       | -                    |
| <i>AGL24</i><br><i>AGAMOUS-LIKE 24</i>                                             | AT4G24540                                        | -                                             | -              | -    | -                                                                             | TC90799 <sup>d</sup>                                                      | -                                              | -                    |
| <i>AP3</i><br><i>APETALA 3</i>                                                     | AT3G54340                                        | -                                             | -              | -    | AC136451 <sup>b,c</sup>                                                       | TC90653 <sup>b,c</sup>                                                    | TC194043                                       | TC8956               |
| <i>PI</i><br><i>PISTILLATA</i>                                                     | AT5G20240                                        | <i>PsPI</i><br>(AY842491)                     | 52%<br>(FL)    | 3    | -                                                                             | TC92737                                                                   | TC179294                                       | TC17763              |
| <i>AG</i><br><i>AGAMOUS</i>                                                        | AT4G18960                                        | <i>PsAG</i> <sup>b</sup><br>(AY884291)        | 70%<br>(FL)    | 1    | AC137837 <sup>b</sup>                                                         | -                                                                         | -                                              | TC9670               |
| <i>SHP1</i><br><i>SHP2</i><br><i>SHATTERPROOF</i>                                  | AT3G58780<br>AT2G42830                           | <i>PsSHP</i> <sup>d</sup><br>(AY884292)       | 66%<br>(FL)    | 1    | -                                                                             | TC86876 <sup>d</sup>                                                      | TC194475 <sup>d</sup>                          | -                    |
| <i>STK</i><br><i>SEEDSTICK</i>                                                     | AT4G09960                                        | -                                             | -              | -    | -                                                                             | TC93057                                                                   | TC177507                                       | -                    |
| <i>ANR1</i><br><i>AGL16</i><br><i>AGL17</i><br><i>AGL21</i><br><i>AGAMOUS-LIKE</i> | AT2G14210<br>AT3G57230<br>AT2G22630<br>AT4G37940 | -                                             | -              | -    | AC123898 <sup>b,c</sup><br>AC144564 <sup>c</sup><br>AC126010 <sup>b,c,e</sup> | TC82622 <sup>b,c,e</sup><br>TC81292 <sup>c,d</sup>                        | AW706936 <sup>c</sup>                          | -                    |

(1) This study; (2) Berbel et al., 2001; (3) Berbel et al., 2005; (4) Buchner and Boutin, 1998; (5) Litt and Irish, 2003; (6) Taylor et al., 2002. (a) identity percentage at the amino-acid level, (FL) full length cDNA, (P) partial cDNA: percentage of Arabidopsis cDNA; (b) map position available; (c) multiple distinct sequences corresponding to a single Arabidopsis gene; (d) exact relationship to Arabidopsis gene unclear; (e) Medicago genomic and EST sequences correspond to the same gene; (f) Several EST sequences available corresponding to the same gene, see supplementary Table 8 for other accession numbers; (-) Sequence not identified.

**Supplemental Table III: *CONSTANS*-like genes**

| Name                                   | Arabidopsis | Pea                            | % <sup>a</sup> | Medicago                  |                             | Soybean                 | Lotus                |
|----------------------------------------|-------------|--------------------------------|----------------|---------------------------|-----------------------------|-------------------------|----------------------|
|                                        | Gene        | Gene                           |                | Genomic                   | EST                         | EST                     | EST                  |
| <i>CO CONSTANS</i>                     | AT5G15840   | <i>PsCOLa</i> <sup>b,d,f</sup> | 72%            | -                         | TC86982 <sup>d</sup>        | -                       | -                    |
| <i>COL1</i>                            | AT5G15850   | (AY830921)                     | (FL)           |                           |                             |                         |                      |
| <i>COL2</i>                            | AT3G02380   |                                |                |                           |                             |                         |                      |
| <i>CONSTANS-LIKE</i><br><i>1, 2</i>    |             |                                |                |                           |                             |                         |                      |
| <i>COL3</i>                            | AT2G24790   | <i>PsCOLb</i> <sup>b,d,f</sup> | 55%            | AC127169 <sup>b,d,e</sup> | AW693899 <sup>b,d,e,f</sup> | TC204287 <sup>c,d</sup> | TC15164 <sup>d</sup> |
| <i>COL4</i>                            | AT5G24930   | (AY830922)                     | (FL)           |                           | TC87753 <sup>d</sup>        | TC204284 <sup>c,d</sup> |                      |
| <i>COL5</i>                            | AT5G57660   |                                |                |                           | TC78669 <sup>d</sup>        | TC203807 <sup>c,d</sup> |                      |
| <i>CONSTANS-LIKE</i><br><i>3, 4, 5</i> |             |                                |                |                           |                             | TC203446 <sup>c,d</sup> |                      |

(a) identity percentage at the amino-acid level, (FL) full length cDNA, (P) partial cDNA: percentage of Arabidopsis cDNA; (b) map position available; (c) multiple distinct sequences corresponding to a single Arabidopsis gene; (d) exact relationship to Arabidopsis gene unclear; (e) Medicago genomic and EST sequences correspond to the same gene; (f) Several EST sequences available corresponding to the same gene, see supplementary Table 10 for other accession numbers; (-) Sequence not identified.

**Supplemental Table IV: *FLOWERING LOCUS T-TERMINAL FLOWER 1*-like genes**

| Name                                    | Arabidopsis Gene | Pea (Garden) Gene                                    | % <sup>a</sup>  | Ref. | Medicago Genomic                                                                       | EST                    | Soybean EST                                        | Lotus EST         |
|-----------------------------------------|------------------|------------------------------------------------------|-----------------|------|----------------------------------------------------------------------------------------|------------------------|----------------------------------------------------|-------------------|
| <i>FT</i><br><i>FLOWERING TIME</i>      | AT1G65480        | <i>PsFTL</i> <sup>d</sup><br>(AY830923)              | 61%<br>(P:23%)  | 1    | AC123593a <sup>b,c,d</sup><br>AC123593b <sup>b,c,d</sup><br>AC123593c <sup>b,c,d</sup> | -                      | TC219541 <sup>c,d</sup><br>BU548465 <sup>c,d</sup> | -                 |
| <i>TSF</i><br><i>TWIN SISTER OF FT</i>  | AT4G20370        |                                                      |                 |      |                                                                                        |                        |                                                    |                   |
| <i>BFT</i><br><i>BROTHER OF FT</i>      | AT5G62040        | -                                                    |                 |      | AC146807                                                                               | -                      | AW707147                                           | AU089275          |
| <i>MFT</i><br><i>MOTHER OF FT</i>       | AT1G18100        | -                                                    |                 |      | AC139526 <sup>b,e</sup>                                                                | TC81061 <sup>b,e</sup> | TC216444                                           | -                 |
| <i>TFL1</i><br><i>TERMINAL FLOWER 1</i> | AT5G03840        | <i>PsTFL1a</i> <sup>b,c</sup><br>(DET)<br>(AY340579) | 72%<br>(FL)     | 2    | AC147007 <sup>d,e</sup>                                                                | TC78713 <sup>d,e</sup> | -                                                  | -                 |
|                                         |                  | <i>PsTFL1b</i> <sup>b,c</sup><br>(AY340580)          | 73 %<br>(P:50%) | 2    | -                                                                                      | -                      | -                                                  | -                 |
|                                         |                  | <i>PsTFL1c</i> <sup>b,c</sup><br>(LF)<br>(AY343326)  | 65%<br>(FL)     | 2    | -                                                                                      | -                      | -                                                  | CTL<br>(AY423715) |

(1) This study; (2) Foucher et al., 2003. (a) identity percentage at the amino-acid level, (FL) full length cDNA, (P) partial cDNA: percentage of Arabidopsis cDNA; (b) map position available; (c) multiple distinct sequences corresponding to a single Arabidopsis gene; (d) exact relationship to Arabidopsis gene unclear; (e) Medicago genomic and EST sequences correspond to the same gene; (f) Several EST sequences available corresponding to the same gene, see supplementary Table 10 for other accession numbers; (-) Sequence not identified.

**Supplemental Table V: CAPS and dCAPS markers for mapping pea genes**

| Gene           | Primers | Sequence                     | T <sub>m</sub> (°C) | Restriction enzyme | Mapping population |
|----------------|---------|------------------------------|---------------------|--------------------|--------------------|
| <i>PsAG</i>    | pM7-FOR | GAAATTGAGTACATGCAGAAAAGGG    | 60                  | -                  | JI15 x JI399       |
|                | pM7-REV | TTCCAATGAGTACTAACCAACTAAC    |                     |                    |                    |
| <i>PsCOLa</i>  | COP.2F  | GCTGGATTCAAGTTACAATGG        | 60                  | <i>TaqI</i>        | JI281 x JI399      |
|                | COP.2R  | CTGGTACAACACCAACATCC         |                     |                    |                    |
| <i>PsCOLa</i>  | COMsel  | CCATGATCATAATCAAGAAGGTAATATT | 55                  | <i>MseI</i>        | TOR x TER          |
|                | CO14    | GATTCAAACTCCAACCCAAGT        |                     |                    |                    |
| <i>PsEMF1a</i> | EMF4    | GGATGGTTGTGGTGGATACGG        | 57                  | <i>BseNI</i>       | TOR x TER          |
|                | EMF8    | CTGGAAAGGGAAATCACTATG        |                     |                    |                    |
| <i>PsEMF1b</i> | EMF4    | GGATGGTTGTGGTGGATACGG        | 57                  | <i>DraI</i>        | TOR x TER          |
|                | EMF8    | CTGGAAAGGGAAATCACTATG        |                     |                    |                    |
| <i>PsFCA</i>   | FCA.1   | TGAGAGGCTGATAGGGAAGAC        | 55                  | <i>BselI</i>       | TOR x TER          |
|                | FCA.3   | ATAAGCAAAGGCAAAAAGAACG       |                     |                    |                    |
| <i>PsFPA</i>   | FPA1    | AAACTTGAGAACGACNCCRTA        | 58                  | <i>MboII</i>       | JI281 x JI399      |
|                | FPA3    | GCGGACTTATTGCMAARGGNGG       |                     |                    |                    |
| <i>PsFVE</i>   | FVEP.11 | TTTGAGGCTCATAAAGCTGC         | 55                  | <i>RsaI</i>        | JI281 x JI399      |
|                | FVEP.14 | GATCATAAGCATTCCAATGG         |                     |                    |                    |
| <i>PsGI</i>    | Gi3     | CTCATAWGARCRTAACTCC          | 55                  | <i>TaqI</i>        | TOR x TER          |
|                | Gi5     | TTCTCAGCVGTTGATYTKC          |                     |                    |                    |
| <i>PsLD</i>    | LD11    | ATCAGTGCTTTATTGGCGTAA        | 60                  | <i>SspI</i>        | TOR x TER          |
|                | LD12    | AAGACGGAAAAGTTCTGTATTG       |                     |                    |                    |
| <i>PsMYB2</i>  | CCA4    | CGTATCGTTCCTTAGTGTG          | 60                  | <i>StyI</i>        | JI281 x JI399      |
|                | CCA5    | ATTCGAAGTCATGCTCAGAAG        |                     |                    |                    |
| <i>PsSOC1a</i> | AGLR3   | CAGTTGGAAAAGTGTGTAAGC        | 60                  | <i>HinfI</i>       | TOR x TER          |
|                | AGLR6   | GGTGGCGGTGGTGGTAGTTGC        |                     |                    |                    |
| <i>PsSOC1b</i> | AGLR8   | TGCTGTTCTATCTTTTGTAAATC      | 57                  | <i>SspI</i>        | TOR x TER          |
|                | AGLR11  | AGCCGGATTAATAACTCAAACA       |                     |                    |                    |

TOR x TER population (Laucou et al., 1998); JI281 x JI399 and JI15 x JI399 (Hall et al., 1997);

**Supplemental Table VI: Additional EST sequences corresponding to genes listed in Tables 1 to 4 and Supplementary Tables 6 to 8**

| Name                                                             | Arabidopsis | Pea <sup>a</sup>     | Medicago                                       | Soybean <sup>c</sup> | Lotus <sup>c</sup>   |
|------------------------------------------------------------------|-------------|----------------------|------------------------------------------------|----------------------|----------------------|
| <i>AP2</i><br><i>APETALA 2</i>                                   | AT4G36920   |                      |                                                | TC21901<br>BE65994   |                      |
| <i>CO CONSTANS</i>                                               | AT5G15840   | AY830921             |                                                |                      |                      |
| <i>COL1</i>                                                      | AT5G15850   | AY826727             |                                                |                      |                      |
| <i>COL2</i>                                                      | AT3G02380   |                      |                                                |                      |                      |
| <i>CONSTANS-LIKE 1, 2</i>                                        |             |                      |                                                |                      |                      |
| <i>COL3</i>                                                      | AT2G24790   | AY830922             | AW693899 <sup>b</sup>                          |                      |                      |
| <i>COL4</i>                                                      | AT5G24930   | AY805328             | TC88293 <sup>b</sup>                           |                      |                      |
| <i>COL5</i>                                                      | AT5G57660   |                      |                                                |                      |                      |
| <i>CONSTANS-LIKE 3, 4, 5</i>                                     |             |                      |                                                |                      |                      |
| <i>CRY1</i><br><i>CRYPTOCHROME 1</i>                             | AT4G08920   |                      | TC89497 <sup>c</sup><br>TC79909 <sup>c</sup>   |                      | TC15430<br>AV424420  |
| <i>CRY2</i><br><i>CRYPTOCHROME 2</i>                             | AT1G04400   |                      | TC78737 <sup>c</sup><br>TC79042 <sup>c</sup>   |                      | AV417531<br>AV424018 |
| <i>ELF5</i><br><i>EARLY FLOWERING 5</i>                          | AT5G62640   |                      |                                                | TC192128<br>TC185647 | BI417263<br>TC13271  |
| <i>EMF2</i><br><i>EMBRYONIC FLOWER 2</i>                         | AT5G51230   |                      |                                                | TC184854<br>TC182138 |                      |
| <i>FKF1</i><br><i>FLAVIN-BINDING, KELCH REPEAT, F-BOX 1</i>      | AT1G68050   |                      |                                                | AI960991<br>TC182454 |                      |
| <i>FLD</i><br><i>FLOWERING LOCUS D</i>                           | AT3G10390   |                      | AW586703 <sup>c</sup><br>TC83020 <sup>c</sup>  |                      |                      |
| <i>FLK</i><br><i>FLOWERING LOCUS K</i>                           | AT3G04610   |                      | TC89387 <sup>c</sup><br>BF636961 <sup>c</sup>  |                      | TC13879<br>TC17620   |
| <i>FPA</i>                                                       | AT2G43410   |                      | TC84230 <sup>c</sup><br>TC82911 <sup>c</sup>   |                      | TC19296<br>TC16749   |
| <i>FPF1</i><br><i>FLOWERING PROMOTING FACTOR 1</i>               | AT5G24860   |                      | TC87988 <sup>c</sup><br>TC90090 <sup>c</sup>   |                      |                      |
| <i>FUL</i><br><i>FRUITFULL</i>                                   | AT5G60910   | AY884287<br>AY306169 |                                                |                      |                      |
| <i>FVE</i>                                                       | AT2G19520   |                      | TC87417 <sup>b</sup><br>TC91602 <sup>b</sup>   |                      | BP058734<br>TC13946  |
| <i>GI</i><br><i>GIGANTEA</i>                                     | AT1G22770   |                      |                                                | TC17500<br>TC17499   | TC7440<br>TC7235     |
| <i>LD</i><br><i>LUMINIDEPENDENS</i>                              | AT4G02560   |                      |                                                | AW569075<br>BE824317 |                      |
| <i>LHY</i><br><i>LATE ELONGATED HYPOCOTYL</i>                    | AT1G01060   |                      | TC89350 <sup>b</sup><br>CA917283 <sup>b</sup>  | TC189020<br>TC196676 |                      |
| <i>PFT1</i><br><i>PHYTOCHROME AND FLOWERING TIME</i>             | AT1G25540   |                      |                                                | TC182513<br>BG041259 |                      |
| <i>PHYB</i><br><i>PHYTOCHROME B</i>                              | AT2G18790   |                      |                                                |                      | TC13239<br>AV427846  |
| <i>PIF3</i><br><i>PHYTOCHROME INTERACTING FACTOR 3</i>           | AT1G09530   |                      | CA919209 <sup>c</sup><br>AW775035 <sup>c</sup> |                      |                      |
| <i>REF6</i><br><i>RELATIVE TO ELF6</i>                           | AT3G48430   |                      |                                                | TC196271<br>TC219371 |                      |
| <i>SOC1</i><br><i>SUPPRESSOR OF OVEREXPRESSION OF CONSTANS 1</i> | AT2G45660   | AY830920<br>AY826728 |                                                |                      |                      |
| <i>TFL2</i><br><i>TERMINAL FLOWER 2</i>                          | AT5G17690   |                      |                                                | AW471580<br>TC197445 |                      |
| <i>VRN1</i><br><i>VERNALIZATION 1</i>                            | AT3G18990   |                      |                                                | TC229117<br>TC229118 |                      |
| <i>ZTL</i><br><i>ZEITLUPE</i>                                    | AT5G57360   |                      |                                                | TC198766<br>TC195494 |                      |

(a) Same pea genes sequenced from different cultivars; (b) Medicago ESTs verified against genomic sequences as same gene; (c) Not experimentally verified.
